# Supplementary material for: Value of information methods to design a clinical trial in a small population to optimise a health economic utility function
Source: Springer Nature journal article supplement (doi:10.1186/s12874-018-0475-0), 2018-02-08
Supplement: MOESM1 [file 12874_2018_475_MOESM1_ESM.pdf]

## Derivation of expected utility function

Assuming that the difference between means follows a normal distribution,  $\bar{X} \sim N(\theta, \tau^2/n)$ , and the unknown parameter also follows a normal distribution,  $\theta \sim N(\mu_0, \sigma_0^2)$ . The optimal utility is

$$G(n, \theta) = (\theta - c_2)(N - n/\rho)I_{\{\bar{x} > z_\alpha \tau / \sqrt{n}\}} + \frac{n}{2}(\theta - c_2) - c_1 n - c_f I_{\{n > 0\}}.$$

The expectation of the utility is the expectation taken over the posterior distribution of  $\theta$  for all possible values of responses,  $\bar{X}$ . However, as  $\bar{X}$  is unknown at the planning stage the expected utility of the optimal decision is obtained from the distribution of  $\bar{X}$  given  $\theta$  and  $n$ . As  $\theta$  is unknown, the expectation of the expected utility is taken over the prior distribution of  $\theta$ ,

$$\begin{aligned} & \mathcal{G}(n, z_\alpha) \\ &= \iint [(\theta - c_2)(N - n/\rho)I_{\{\bar{x} \geq z_\alpha \tau / \sqrt{n}\}} + (\theta - c_2)\frac{n}{2} \\ & \quad - c_1 n - c_f I_{\{n > 0\}}] f(\theta|\bar{x})f(\bar{x}|n) d\bar{x} d\theta \\ &= (N - n) \int_{z_\alpha \tau / \sqrt{n}}^{\infty} \int_{-\infty}^{\infty} \theta f(\theta|\bar{x})f(\bar{x}|n) d\theta d\bar{x} \\ & \quad - c_2 \Phi(-Z)(N - n/\rho) + \frac{n}{2}(\mu_0 - c_2) - c_1 n \\ & \quad - c_f I_{\{n > 0\}} \\ &= (N - n/\rho) \left\{ (\mu_0 - c_2)\Phi(-Z) + \frac{\sigma_0^2}{\sigma_x} \phi(Z) \right\} \\ & \quad + \frac{n}{2}(\mu_0 - c_2) - c_1 n - c_f I_{\{n > 0\}} \end{aligned} \tag{1}$$

where  $f(\theta|\bar{x})$  is the posterior density of  $\theta$  given  $\bar{x}$ ,  $f(\bar{x}|n)$  is the prior predictive density function of  $\bar{x}$ ,  $\Phi(\cdot)$  is the normal cumulative distribution function,  $\phi(\cdot)$  is the normal density function,  $Z = \frac{z_\alpha \tau / \sqrt{n} - \mu_0}{\sigma_x}$  and  $\sigma_x^2 = \sigma_0^2 + \tau^2/n$ . The expected utility is a function of  $n$  and  $z_\alpha$ .
